# Supplementary material for: AI-Assisted Screening of Oral Potentially Malignant Disorders Using Smartphone-Based Photographic Images
Source: MDPI journal article supplement (doi:10.3390/cancers15164120), 2023-08-16
Supplement: s1 [file s1]

## Supplementary information

### AI-Assisted Screening of Oral Potentially Malignant Disorders Using Smartphone-Based Photographic Images

Vivek Talwar, Pragya Singh, Nirza Mukhia, Anupama Shetty, Praveen Birur, Karishma M. Desai, Chinnababu Sunkavalli, Konala S. Varma, Ramanathan Sethuraman, C.V. Jawahar and P. K. Vinod

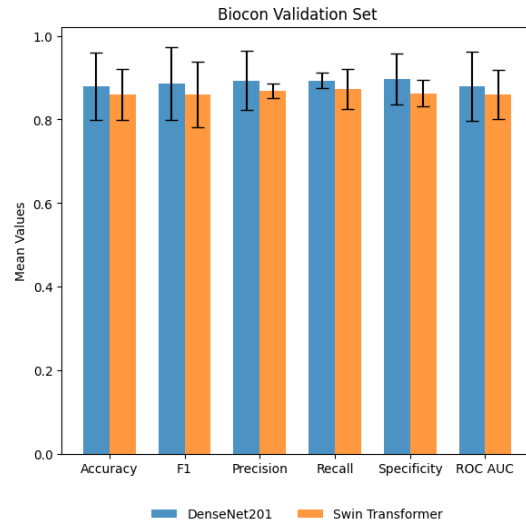

**Figure S1:** Performance of DenseNet201 and Swin Transformer (base) on the Biocon validation set. The average value of performance metrics with a 95% confidence interval are shown.

**Table S1:** DenseNet201 and Swin Transformer (base) cross-validation performance on the Biocon and grace test sets. The average value of performance metrics with a 95% confidence interval are given in the bracket.

| Biocon (test)              |                        |                        |                         |                        |                        |
|----------------------------|------------------------|------------------------|-------------------------|------------------------|------------------------|
| DenseNet201                | 0.84<br>(CI 0.80-0.88) | 0.84<br>(CI 0.83-0.85) | 0.85<br>(CI 0.75-0.94)  | 0.84<br>(CI 0.79-0.89) | 0.83<br>(CI 0.81-0.85) |
| Swin Transformer<br>(Base) | 0.83<br>(CI 0.79-0.86) | 0.83<br>(CI 0.80-0.85) | 0.83<br>(CI 0.72-0.94)  | 0.83<br>(CI 0.78-0.88) | 0.82<br>(CI 0.77-0.87) |
| Grace (test)               |                        |                        |                         |                        |                        |
| DenseNet201                | 0.73<br>(CI 0.72-0.75) | 0.75<br>(CI 0.68-0.82) | 0.75<br>(CI 0.68 -0.82) | 0.73<br>(CI 0.67-0.78) | 0.70<br>(CI 0.68-0.72) |
| Swin Transformer<br>(Base) | 0.72<br>(CI 0.69-0.74) | 0.73<br>(CI 0.71-0.76) | 0.68<br>(CI 0.65-0.72)  | 0.70<br>(CI 0.68-0.73) | 0.75<br>(CI 0.72-0.78) |
